# Supplementary material
Source: PubMed Central journal article supplement (PMC7078808)
Supplement: jama-323-1052-s003.pdf [file jama-323-1052-s003.pdf]

Wijnberge M, Geerts BF, Hol L, et al. Effect of a machine learning–derived early warning system for intraoperative hypotension vs standard care on depth and duration of intraoperative hypotension during elective noncardiac surgery: the HYPE randomized clinical trial [published online February 17, 2020]. *JAMA*. doi:10.1001/jama.2020.0592

### **Data Sharing Statement**

#### **Data**

**Data available:** No
